# Supplementary material
Source: Springer Nature journal article supplement (https://www.springermedizin.de/resource/supplementary/12885_2007_1049_MOESM1_ESM.pdf/9470980)

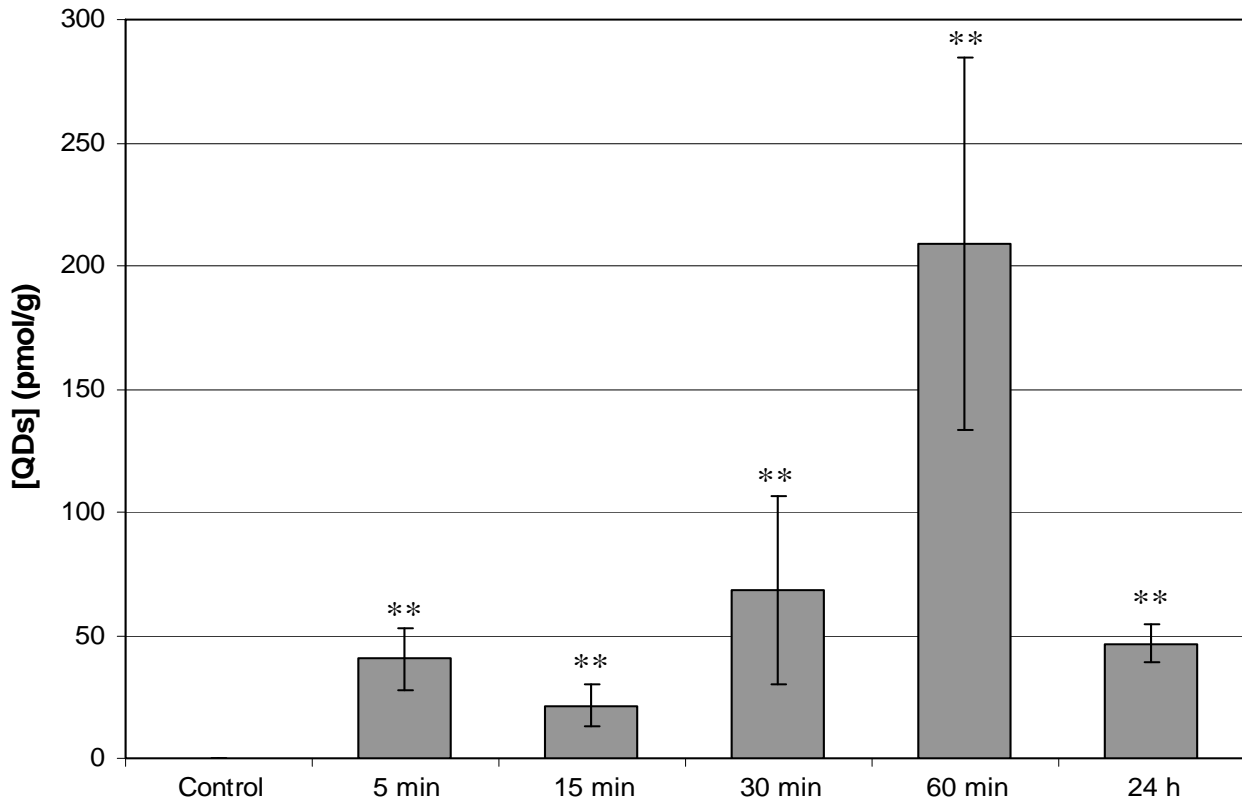

Supplement: MOESM1 [file 9470980]
